# Supplementary material for: Understanding the Process of Drug Addiction Recovery Through First-Hand Experiences: A Qualitative Study in the Netherlands Using Lifeline Interviews
Source: PubMed Central journal article supplement (PMC10426251; doi:10.1177/10497323231174161), 2023-06-06
Supplement: sj-pdf-1-qhr-10.1177_10497323231174161.pdf [file sj-pdf-1-qhr-10.1177_10497323231174161.pdf]

**Supplementary table 1. Thematic table connecting themes, sub-themes and codes**

| Theme                                                                                           | Sub-themes                            | Codes                                                | Examples of initial codes                                  |                                                                                    |                                |                                     |
|-------------------------------------------------------------------------------------------------|---------------------------------------|------------------------------------------------------|------------------------------------------------------------|------------------------------------------------------------------------------------|--------------------------------|-------------------------------------|
| <b>1: Recovery is a broad process of change because addiction is interwoven with everything</b> | Recovery is more than not using drugs | Being abstinent is not the same as being in recovery | Not using drugs did not improve situation                  |                                                                                    |                                |                                     |
|                                                                                                 |                                       |                                                      | Experiencing problems while in recovery                    |                                                                                    |                                |                                     |
|                                                                                                 |                                       |                                                      | Changed environment or moved for recovery                  |                                                                                    |                                |                                     |
|                                                                                                 |                                       |                                                      | Addiction is also in other behavior                        | Problems with sexual behavior and relations while in addiction                     |                                |                                     |
|                                                                                                 |                                       |                                                      |                                                            | Mental health problems linked to addiction                                         |                                |                                     |
|                                                                                                 |                                       |                                                      |                                                            | Doing 'good' as part of recovery                                                   |                                |                                     |
|                                                                                                 | Broad recovery goals                  | Having practical goals was important                 |                                                            | Achieving a day routine                                                            |                                |                                     |
|                                                                                                 |                                       |                                                      |                                                            | Achieving financial stability                                                      |                                |                                     |
|                                                                                                 |                                       |                                                      |                                                            | Acquiring a job                                                                    |                                |                                     |
|                                                                                                 |                                       |                                                      |                                                            | Trying to become happier                                                           |                                |                                     |
|                                                                                                 |                                       | Expecting emotional gains                            | Trying to achieve serenity                                 |                                                                                    |                                |                                     |
| <b>2: Recovery is reconsidering identity, seeing things in a new light</b>                      |                                       | Gaining control                                      | Considering and taking care of own needs                   |                                                                                    |                                |                                     |
|                                                                                                 |                                       |                                                      | Staying close to myself                                    |                                                                                    |                                |                                     |
|                                                                                                 |                                       |                                                      | Getting to know myself                                     |                                                                                    |                                |                                     |
|                                                                                                 |                                       |                                                      | Identity change                                            | Adopt non-user identity                                                            |                                |                                     |
|                                                                                                 |                                       |                                                      |                                                            | Dealing with vulnerabilities                                                       |                                |                                     |
|                                                                                                 |                                       |                                                      |                                                            | Diagnosis of behavior                                                              |                                |                                     |
|                                                                                                 |                                       |                                                      | Seeing things in a new light                               | Is controlled use possible for me?                                                 |                                |                                     |
|                                                                                                 |                                       |                                                      |                                                            | Learning about self through helping others                                         |                                |                                     |
|                                                                                                 |                                       | <b>3: Recovery is a staged long-term process</b>     |                                                            | Planting a seed                                                                    | Past events facilitated change | Emotionally touched by an encounter |
|                                                                                                 |                                       |                                                      |                                                            |                                                                                    |                                | Life impacting events               |
|                                                                                                 |                                       |                                                      | Previous recovery attempts helped later attempt            |                                                                                    |                                |                                     |
|                                                                                                 | Stages of recovery                    | Turning points                                       | Period to stabilize                                        |                                                                                    |                                |                                     |
|                                                                                                 |                                       |                                                      | Intense focus on recovery                                  |                                                                                    |                                |                                     |
|                                                                                                 |                                       |                                                      | Maintaining recovery                                       |                                                                                    |                                |                                     |
|                                                                                                 |                                       |                                                      | Broadening recovery goals                                  |                                                                                    |                                |                                     |
|                                                                                                 |                                       | Changing meaning of recovery                         | Broadening recovery goals                                  |                                                                                    |                                |                                     |
|                                                                                                 |                                       |                                                      | Finding new sources of motivation                          |                                                                                    |                                |                                     |
|                                                                                                 |                                       |                                                      | Being able to do new things                                |                                                                                    |                                |                                     |
|                                                                                                 | Recovering or recovered?              | Finding new things to recover                        | Broadening recovery goals                                  |                                                                                    |                                |                                     |
|                                                                                                 |                                       | Moving on                                            | Detaching from addiction / recovery identity               |                                                                                    |                                |                                     |
|                                                                                                 |                                       | Becoming rebellious or stubborn in recovery          | Finding an own way to maintain recovery                    |                                                                                    |                                |                                     |
| <b>4: Universal life processes are part of recovery</b>                                         |                                       | Normal or universal processes                        | Becoming older                                             |                                                                                    |                                |                                     |
|                                                                                                 |                                       |                                                      | Changing lifestyle preferences                             |                                                                                    |                                |                                     |
|                                                                                                 |                                       |                                                      | Not so different from people without addiction experiences |                                                                                    |                                |                                     |
|                                                                                                 |                                       |                                                      | Insights from recovery apply to other things               | People without addiction experiences benefit from recovery insights or experiences |                                |                                     |
|                                                                                                 |                                       |                                                      |                                                            | This should be taught at schools                                                   |                                |                                     |
|                                                                                                 |                                       |                                                      |                                                            | Everyone needs a bit of recovery                                                   |                                |                                     |
